# Supplementary material for: Modular composite hydrogels from cholesterol-functionalized polycarbonates for antimicrobial applications
Source: Royal Society of Chemistry journal article supplement (doi:10.1039/c5tb00811e), 2015-01-01
Supplement: c5tb00811e1.pdf [file c5tb00811e1.pdf]

### Supplementary Information

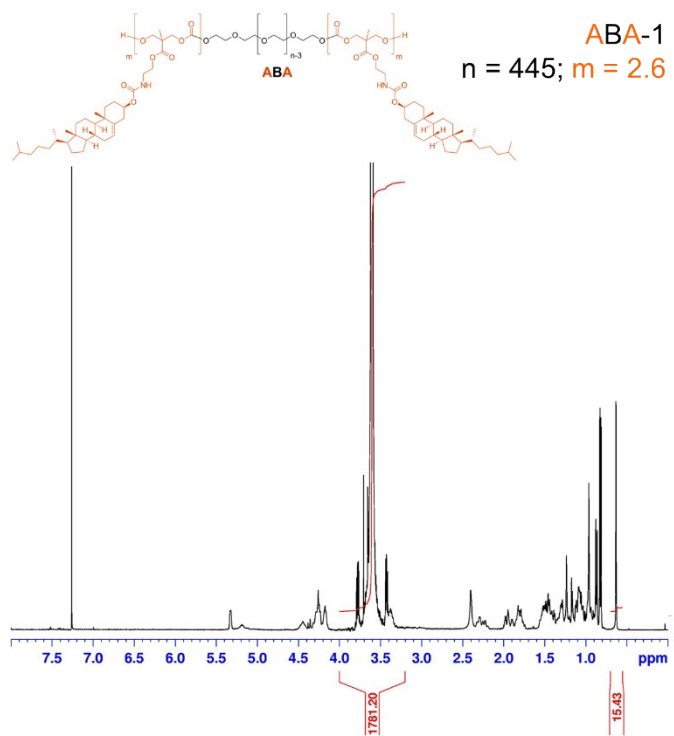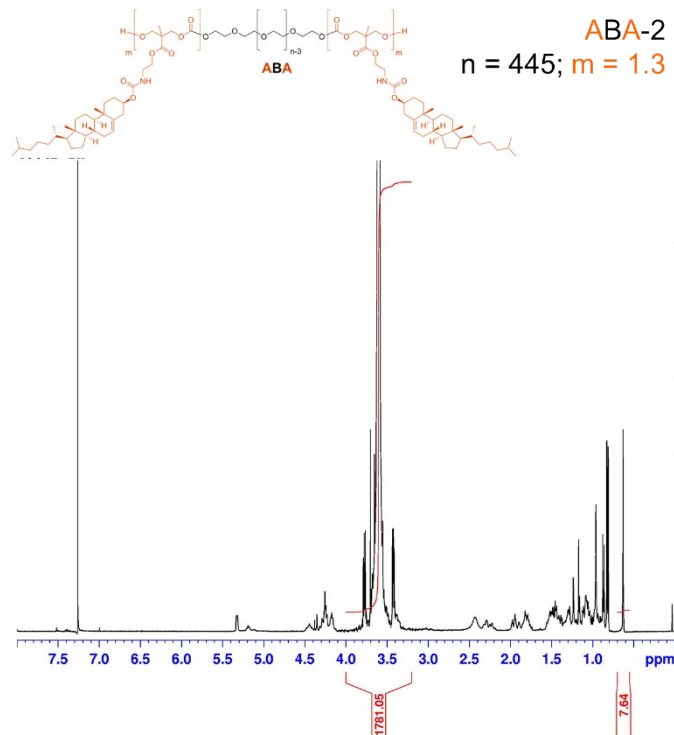

**Figure S1.** <sup>1</sup>H-NMR spectrum of ABA-1 (top) and ABA-2 (bottom) triblock copolymers

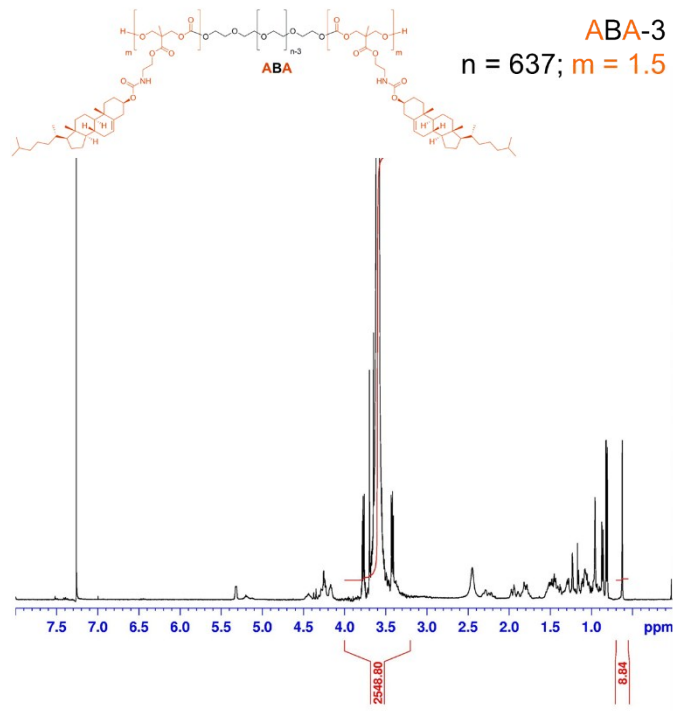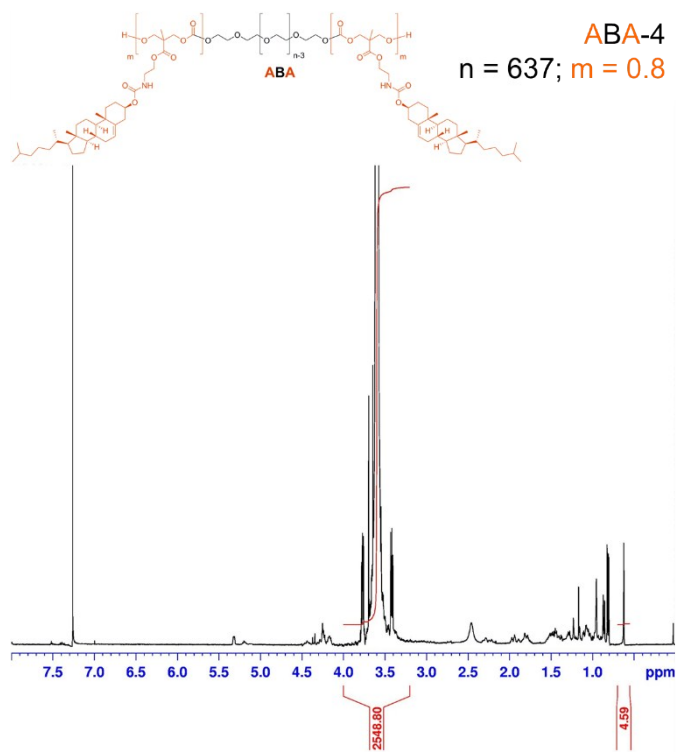

**Figure S2.** <sup>1</sup>H-NMR spectrum of ABA-3 (top) and ABA-4 (bottom) triblock copolymers

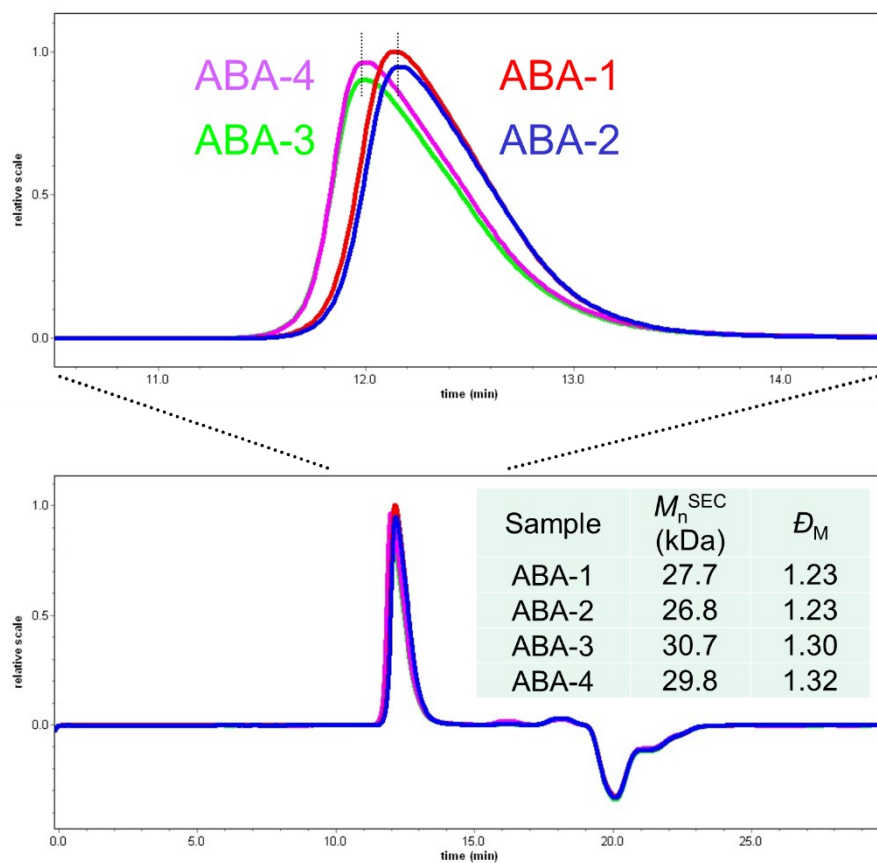

**Figure S3.** Overlaid SEC traces of triblock copolymers with their uncorrected polystyrene equivalent molar mass ( $M_n^{SEC}$ ) and molar-mass dispersity ( $D_M$ ) values listed.
